# Supplementary material for: Highly conductive polymer composites incorporated with electrochemically exfoliated graphene fillers
Source: Royal Society of Chemistry journal article supplement (doi:10.1039/c5ra04202j), 2015-01-01
Supplement: c5ra04202j1.pdf [file c5ra04202j1.pdf]

**Supplementary Material (ESI)**

**Highly conductive polymer composites incorporated with  
electrochemically exfoliated graphene fillers \*\***

Seung Han Ryu, Seil Kim, Han Kim, Sung-Oong Kang,\* and Yong-Ho Choa\*

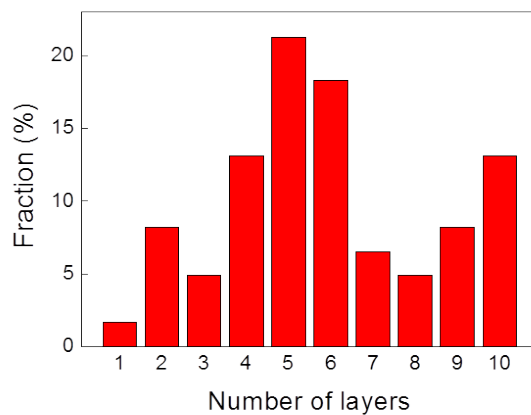

**Fig. S1** Statistical thickness analysis of EGs using AFM measurement

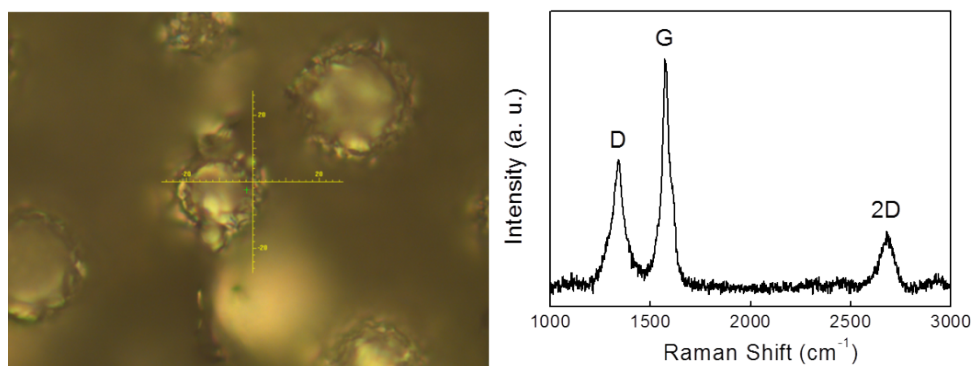

**Fig. S2** (a) Optical image of unpressed EGs/PMMA particles. The area for Raman spectrum is pointed by a cross. (b) Raman spectra obtained from the area pointed by a cross in Fig. S1a. The Raman excitation laser wavelength is 532 nm.

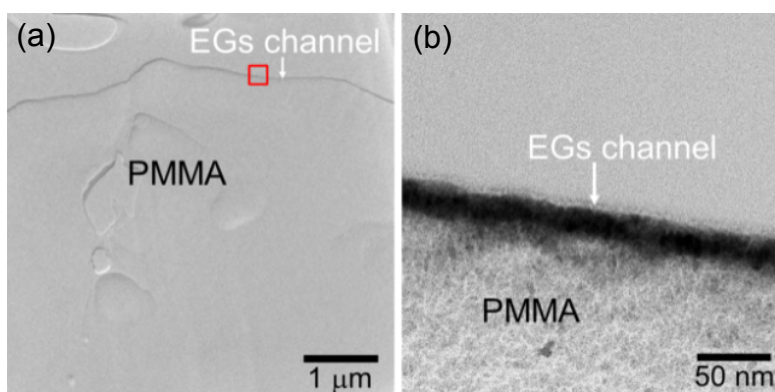

**Fig. S3** (a) Low- and (b) high-magnification cross-sectional TEM images of the EG-based conducting channel with the width of ~23 nm. The high-magnification image was obtained from the area marked in a red square of (a). The cross-sectional TEM sample was prepared using a focused ion beam technique.
